# Supplementary material for: C. elegans DAF-16/FOXO interacts with TGF-ß/BMP signaling to induce germline tumor formation via mTORC1 activation
Source: PubMed Central journal article supplement (PMC5467913; doi:10.1371/journal.pgen.1006801), 2017-05-26
Supplement: pgen.1006801.s011.pdf [file pgen.1006801.s011.pdf]

## S1 Table. Sterility

| strains                                                         | sterile | n   |
|-----------------------------------------------------------------|---------|-----|
| N2                                                              | 0%      | 90  |
| <b><i>shc-1(ok198);ls[daf-16::GFP]</i></b>                      | 49%     | 90  |
| + <i>sma-6(wk7)</i>                                             | 0%      | 121 |
| + <i>dbl-1(nk3)</i>                                             | 0%      | 101 |
| + <i>sma-2(e502)</i>                                            | 0%      | 142 |
| + <i>sma-3(e491)</i>                                            | 0%      | 131 |
| + <i>sma-9(ok1628)</i>                                          | 0%      | 175 |
| +L4440                                                          | 51%     | 100 |
| + <i>pqm-1</i> (RNAi)                                           | 53%     | 98  |
| <b><i>shc-1(ok198);ls[daf-16::GFP]</i> (L4440)</b>              | 47%     | 90  |
| + <i>rsk-1</i> RNAi                                             | 1%      | 106 |
| + <i>hpo-11</i> RNAi                                            | 0%      | 123 |
| + <i>sma-6</i> RNAi                                             | 0%      | 95  |
| <b><i>shc-1(ok198) rrf-1(ok589);ls[daf-16::GFP]</i> (L4440)</b> | 14%     | 94  |
| + <i>sma-6</i> RNAi                                             | 15%     | 98  |

n: number of examined animals.

This table is related to the main Fig 1.
