# Supplementary material for: C. elegans DAF-16/FOXO interacts with TGF-ß/BMP signaling to induce germline tumor formation via mTORC1 activation
Source: PubMed Central journal article supplement (PMC5467913; doi:10.1371/journal.pgen.1006801), 2017-05-26
Supplement: pgen.1006801.s012.pdf [file pgen.1006801.s012.pdf]

**S2 Table. Defects in gonadal integrity**

| Genotype                                                        | % day one adult with disrupted gonad | SD   | n   | P Value              |
|-----------------------------------------------------------------|--------------------------------------|------|-----|----------------------|
| N2 wild-type                                                    | 0.0                                  |      | 90  |                      |
| <b><i>shc-1(ok198);ls[daf-16::GFP]</i></b>                      | 98.9                                 | 1.9  | 90  |                      |
| + <i>sma-6(wk7)</i>                                             | 24.3                                 | 11.2 | 121 | <0.0001 <sup>a</sup> |
| + <i>dbl-1(nk3)</i>                                             | 43.9                                 | 18.7 | 101 | <0.0001 <sup>a</sup> |
| + <i>sma-2(e502)</i>                                            | 3.2                                  | 3.9  | 142 | <0.0001 <sup>a</sup> |
| + <i>sma-3(e491)</i>                                            | 17.2                                 | 18.3 | 131 | <0.0001 <sup>a</sup> |
| + <i>sma-9(ok1628)</i>                                          | 39.5                                 | 3.7  | 96  | <0.0001 <sup>a</sup> |
| <b><i>shc-1(ok198);byEx800[daf-16(4A)::GFP]</i></b>             | 57.0                                 | 10.5 | 90  |                      |
| + <i>sma-6(wk7)</i>                                             | 5.1                                  | 4.3  | 108 | <0.0001 <sup>b</sup> |
| <b><i>shc-1(ok198) rrf-1(ok589);ls[daf-16::GFP] (L4440)</i></b> | 84.1                                 | 2.9  | 95  |                      |
| + <i>sma-6</i> RNAi                                             | 78.5                                 | 7.5  | 130 | 0.2664 <sup>c</sup>  |
| <b><i>shc-1(ok198);ls[daf-16::GFP] (L4440)</i></b>              | 100.0                                |      | 96  |                      |
| + <i>sma-6</i> RNAi                                             | 40.2                                 | 6.7  | 95  | <0.0001 <sup>d</sup> |
| + <i>daf-1</i> RNAi                                             | 98.9                                 | 1.9  | 90  |                      |
| + <i>daf-4</i> RNAi                                             | 97.8                                 | 1.5  | 90  |                      |
| + <i>rsk-1</i> RNAi                                             | 76.9                                 | 5.1  | 106 | <0.0001 <sup>d</sup> |
| + <i>hpo-11</i> RNAi                                            | 62.0                                 | 4.3  | 123 | <0.0001 <sup>d</sup> |
| + <i>pqm-1</i> RNAi                                             | 100                                  |      | 90  |                      |

n: Number of examined animals. P values were relative to: a: *shc-1(ok198);ls[daf-16::GFP]*; b: *shc-1(ok198);byEx800[daf-16(4A)::GFP]*; c: *shc-1(ok198)-1 rrf-1(ok589);ls[daf-16::GFP] (L4440)*; d: *shc-1(ok198);ls[daf-16::GFP](L4440)*; e: *shc-1(ok198);sma-6(wk7);ls[daf-16::GFP]*.

This table is related to the main Fig 1 and 2.
