# Supplementary material for: C. elegans DAF-16/FOXO interacts with TGF-ß/BMP signaling to induce germline tumor formation via mTORC1 activation
Source: PubMed Central journal article supplement (PMC5467913; doi:10.1371/journal.pgen.1006801), 2017-05-26
Supplement: pgen.1006801.s013.pdf [file pgen.1006801.s013.pdf]

### S3 Table. Summary of lifespan

| Genotype                                            | Mean lifespan<br>at 25°C<br>(days) | Number (n) of examined<br>animals |
|-----------------------------------------------------|------------------------------------|-----------------------------------|
| <i>fer-15(b26)</i> + L4440                          | 13.4                               | 87                                |
| <i>fer-15(b26)</i> + <i>sma-6</i> RNAi              | 12.8                               | 130                               |
| <i>fer-15(b26);daf-2(e1370)</i> + L4440             | 25.2                               | 90                                |
| <i>fer-15(b26);daf-2(e1370)</i> + <i>sma-6</i> RNAi | 27.2                               | 84                                |

This table is related to the main Fig 2.
