# Supplementary material for: C. elegans DAF-16/FOXO interacts with TGF-ß/BMP signaling to induce germline tumor formation via mTORC1 activation
Source: PubMed Central journal article supplement (PMC5467913; doi:10.1371/journal.pgen.1006801), 2017-05-26
Supplement: pgen.1006801.s015.pdf [file pgen.1006801.s015.pdf]

**S5 Table. Summary of body length**

| Strains                                     | Body length $\pm$ SD (mm) | Number (n) of examined animals |
|---------------------------------------------|---------------------------|--------------------------------|
| N2                                          | 1.10 $\pm$ 0.09           | 16                             |
| <i>daf-2(e1370)</i>                         | 1.22 $\pm$ 0.06           | 13                             |
| <i>daf-16(mu86);daf-2(e1370)</i>            | 1.08 $\pm$ 0.06           | 19                             |
| <i>sma-6(wk7)</i>                           | 0.70 $\pm$ 0.06           | 14                             |
| <i>sma-6(wk7);daf-2(e1370)</i>              | 0.94 $\pm$ 0.06           | 10                             |
| <i>daf-16(mu86);sma-6(wk7);daf-2(e1370)</i> | 0.59 $\pm$ 0.04           | 21                             |

n: numbers of examined animals.

This table is related to the main Fig 2.
