# Supplementary material for: C. elegans DAF-16/FOXO interacts with TGF-ß/BMP signaling to induce germline tumor formation via mTORC1 activation
Source: PubMed Central journal article supplement (PMC5467913; doi:10.1371/journal.pgen.1006801), 2017-05-26
Supplement: pgen.1006801.s016.pdf [file pgen.1006801.s016.pdf]

## S6 Table. Transgenic animals generated for this work

| genotype / transgene                                                          | expression in:                       |
|-------------------------------------------------------------------------------|--------------------------------------|
| <b><i>shc-1; sma-6; zls356[daf-16::GFP] +</i></b>                             |                                      |
| <i>byEx1248[Pelt-2::sma-6; Pmyo-2::mCherry]</i>                               | intestine                            |
| <i>byEx1251[Pmyo-2::sma-6; Pmyo-2::mCherry]</i>                               | pharynx                              |
| <i>byEx1486[Pfos-1::sma-6; Pmyo-2::mCherry]</i>                               | somatic gonad                        |
| <i>byEx1527[Pfos-1::sma-6; Pdpi-7::sma-6; Pmyo-2::mCherry]</i>                | somatic gonad and hypodermis         |
| <i>byEx1530[Pfos-1::sma-6; Pmyo-2::sma-6; Pelt-2::sma-6; Pmyo-2::mCherry]</i> | somatic gonad, intestine and pharynx |
| <b><i>sma-6(wk7) +</i></b>                                                    |                                      |
| <i>byEx1460[Pfos-1::sma-6::GFP; Pmyo-2::mCherry]</i>                          | somatic gonad                        |
| <i>byEx1524[Pmyo-2::sma-6;; Pmyo-2::CFP]</i>                                  | pharynx                              |
| <i>byEx1347[Pelt-2::sma-6; Pmyo-2::CFP]</i>                                   | intestine                            |
| <i>byEx1322[Pdpi-7::sma-6; Pmyo-2::CFP]</i>                                   | hypodermis                           |
| <b><i>daf-16(mu86) +</i></b>                                                  |                                      |
| <i>byEx1351[Pdpi-7::daf-16::GFP; Pmyo-2::CFP]</i>                             | hypodermis                           |
| <i>byEx1385[Punc-119::daf-16::GFP; Pmyo-2::CFP]</i>                           | neuron                               |
| <i>byEx1388[Pmyo-3::daf-16::GFP; Pmyo-2::CFP]</i>                             | muscle                               |
| <i>byEx1391[Pges-1::daf-16::GFP; Pmyo-2::CFP]</i>                             | intestine                            |
| <i>byIs217[Pdpi-7::daf-16(4A)::GFP; Pmyo-2::CFP]</i>                          | hypodermal nucleus                   |

This table is related to the main Fig 3 and 5.
