# Supplementary material for: C. elegans DAF-16/FOXO interacts with TGF-ß/BMP signaling to induce germline tumor formation via mTORC1 activation
Source: PubMed Central journal article supplement (PMC5467913; doi:10.1371/journal.pgen.1006801), 2017-05-26
Supplement: pgen.1006801.s017.pdf [file pgen.1006801.s017.pdf]

**S7 Table. Enriched GO terms for genes which are upregulated both by DAF-16 and BMP signaling in *shc-1;ls[daf-16::GFP]* L3 animals**

| Gene Ontology Category               | Gene count | P-value  |
|--------------------------------------|------------|----------|
| <b>Cell signaling</b>                |            |          |
| phosphoprotein phosphatase activity  | 28         | 8,87E-11 |
| protein kinase activity              | 36         | 1,59E-05 |
| <b>Cell cycle</b>                    |            |          |
| cell cycle process                   | 30         | 3,57E-06 |
| nuclear division                     | 21         | 2,38E-04 |
| cell division                        | 18         | 8,25E-03 |
| condensed chromosome                 | 33         | 9,18E-03 |
| <b>Reproduction</b>                  |            |          |
| single organism reproductive process | 39         | 3,18E-08 |
| P granule                            | 11         | 7,47E-04 |
| <b>Energy pathway,</b>               |            |          |
| ATP binding                          | 52         | 1,15E-03 |
| <b>Metabolism</b>                    |            |          |
| Metabolic pathways                   | 20         | 2,50E-03 |
| Fatty acid metabolism                | 5          | 5,93E-03 |
| <b>Other</b>                         |            |          |
| cytoskeleton                         | 50         | 1,86E-16 |
| Apoptosis - multiple species         | 3          | 5,84E-03 |
| mRNA 3'-UTR binding                  | 6          | 6,07E-03 |
| Nitrogen metabolism                  | 3          | 7,72E-03 |

This table is related to the main Fig 4.
