# Supplementary material for: C. elegans DAF-16/FOXO interacts with TGF-ß/BMP signaling to induce germline tumor formation via mTORC1 activation
Source: PubMed Central journal article supplement (PMC5467913; doi:10.1371/journal.pgen.1006801), 2017-05-26
Supplement: pgen.1006801.s018.pdf [file pgen.1006801.s018.pdf]

P-Value

0.525

\*The P values were calculated by comparing *shc-1;[daf-16::GFP]* with *daf-16 shc-1* or *shc-1;sma-6;[daf-16::GFP]*, or *daf-2* with *daf-16;daf-2*, respectively.

This table is related to the main Fig 5.
