# Supplementary material for: C. elegans DAF-16/FOXO interacts with TGF-ß/BMP signaling to induce germline tumor formation via mTORC1 activation
Source: PubMed Central journal article supplement (PMC5467913; doi:10.1371/journal.pgen.1006801), 2017-05-26
Supplement: pgen.1006801.s019.pdf [file pgen.1006801.s019.pdf]

**S9 Table. *daf-15* and *rsks-1* primers tested for CHIP-qPCR**

| <i>daf-15</i> primers | forward primers          | reverse primers         |
|-----------------------|--------------------------|-------------------------|
| 1                     | CACTTGCACGAATCACGTCT     | TCGGCAAAAAGTGCAAAAACC   |
| 2                     | AACGTTGCGAAACCCGTAAA     | TCCGTTGCACTTTTTGTCTCA   |
| 3                     | TGCATGAGTCATCCCACAAAGT   | GCTGTGATTCAGTGCTGCG     |
| 4                     | AGCACTGAATCACAGCCAAT     | CGGGTTTCGCAACGTTTTTCAT  |
| 5                     | TGCATGAGTCATCCCACAAAG    | TGTGATTCAGTGCTGCGTAT    |
| 6                     | GATGAAAACGTTGCGAAACCC    | GCGCTCCGTTGCACTTTT      |
| 7                     | ATGGACCTGGATGTATGCGT     | CAATGATGTTCTGTTGTCACTGT |
| 8                     | CCACCTGGTTGTGTTTGCAC     | GCCTTTGGATACATTTCGACGC  |
| 9                     | ATTTAAATTCCAGAGCTCCACCTG | ATACATCCAGGTCCATGGCAG   |
| 10                    | GCTCCACCTGGTTGTGTTTG     | AAGCCTTTGGATACATTTCGACG |
| <i>rsks-1</i> primers | forward primers          | reverse primers         |
| 1                     | AACCATGCGAAAAAGCGTGA     | TCTCTCGTTTTTCACTCCCCC   |
| 2                     | ACTCAAACCGCCGAGAAAC      | AGCTTTGCTTGCCGATTTCA    |
| 3                     | TTTCGCGTTTTTACGGGCTT     | TCGTGTCAAGACCAGGGACA    |
| 4                     | CTCAAACCGCCGAGAAACC      | GTACACCCGGTCGTGTCAAG    |
| 5                     | TTTGGAATTTTCGCAACGACGA   | AAGCACACAAATCGTGGCAAAA  |
| 6                     | CGGGAGAGGGGTCGAAAAAC     | GTCGTTGCGAAATTCCAAAGTG  |
| 7                     | TTTGGAATTTTCGCAACGACG    | CACACAAATCGTGGCAAAAACG  |
| 8                     | CCAAATTCCTTGTTGCTTCCCC   | GCTTTCACCTTGACAACGCC    |
| 9                     | CTCCCTTTGTAGTCTCGCCG     | TCTCTGTCGCTTGACTCTGAC   |
| 10                    | TTCACACGCGTAAACAAGCA     | TTCGGCGAGACTACAAAGGG    |

This table is related to the main Fig 5.
