# Supplementary material for: C. elegans DAF-16/FOXO interacts with TGF-ß/BMP signaling to induce germline tumor formation via mTORC1 activation
Source: PubMed Central journal article supplement (PMC5467913; doi:10.1371/journal.pgen.1006801), 2017-05-26
Supplement: pgen.1006801.s020.pdf [file pgen.1006801.s020.pdf]

**S10 Table. Numbers of germ nuclei in the proliferation zone of day one adults**

| <b>Genotype/transgenes/RNAi</b>                     | <b>Number of germ nuclei</b> | <b>SEM</b> | <b>n</b> | <b>P-Value</b> |
|-----------------------------------------------------|------------------------------|------------|----------|----------------|
| <b>N2</b>                                           | 248.9                        | 3.6        | 26       | < 0.0001       |
| <b><i>daf-16(mu86)</i></b>                          | 201.6                        | 4.0        | 37       |                |
| + hypodermal <i>daf-16</i>                          | 249.7                        | 6.5        | 27       | < 0.0001       |
| + hypodermal nuclear <i>daf-16</i>                  | 238.7                        | 6.6        | 32       | < 0.0001       |
| + intestinal <i>daf-16</i>                          | 233.7                        | 6.0        | 25       | < 0.0001       |
| + muscular <i>daf-16</i>                            | 200.0                        | 8.1        | 24       | 0.9999         |
| + neuronal <i>daf-16</i>                            | 208.8                        | 5.2        | 21       | 0.9313         |
| + hypodermal <i>sma-6</i>                           | 188.0                        | 7.9        | 22       | 0.4326         |
| <b><i>sma-6(wk7)</i></b>                            | 90.6                         | 2.9        | 26       |                |
| + somatic gonadal <i>sma-6</i>                      | 194.5                        | 7.0        | 22       | < 0.0001       |
| + hypodermal <i>sma-6</i>                           | 118.6                        | 5.0        | 27       | < 0.0001       |
| + pharyngeal <i>sma-6</i>                           | 84.0                         | 2.6        | 29       | 0.8915         |
| + intestinal <i>sma-6</i>                           | 94.7                         | 3.5        | 18       | 0.9148         |
| + hypodermal <i>daf-16</i>                          | 81.0                         | 3.5        | 19       | 0.6504         |
| <b><i>rde-1;Is[Plin-26::rde-1]+L4440</i></b>        | 227.3                        | 3.0        | 26       |                |
| + <i>daf-15</i> RNAi                                | 194.0                        | 5.9        | 21       | < 0.0001       |
| + <i>rheb-1</i> RNAi                                | 201.1                        | 3.0        | 27       | < 0.0001       |
| + <i>rsks-1</i> RNAi                                | 171.7                        | 4.4        | 22       | < 0.0001       |
| + <i>hpo-11</i> RNAi                                | 201.0                        | 3.2        | 26       | < 0.0001       |
| <b><i>daf-16;rde-1;Is[Plin-26::rde-1]+L4440</i></b> | 207.3                        | 6.4        | 25       |                |
| + <i>daf-15</i> RNAi                                | 206.0                        | 5.1        | 23       | 0.9998         |
| + <i>rheb-1</i> RNAi                                | 211                          | 5.5        | 21       | 0.9680         |
| + <i>rsks-1</i> RNAi                                | 177.5                        | 3.9        | 25       | 0.0005         |
| + <i>hpo-11</i> RNAi                                | 192.0                        | 5.8        | 25       | 0.1450         |
| <b>Genotype/transgenes/RNAi</b>                     | <b>Number of germ nuclei</b> | <b>SEM</b> | <b>n</b> | <b>P-Value</b> |

|                                                    |       |     |    |        |
|----------------------------------------------------|-------|-----|----|--------|
| <b><i>sma-6;rde-1;ls[Plin-26::rde-1]+L4440</i></b> | 93.9  | 4.1 | 19 |        |
| + <i>daf-15</i> RNAi                               | 99.5  | 3.1 | 27 | 0.6554 |
| + <i>rheb-1</i> RNAi                               | 100.9 | 3.6 | 26 | 0.4730 |
| + <i>rsk-1</i> RNAi                                | 77.4  | 2.6 | 25 | 0.0082 |
| + <i>hpo-11</i> RNAi                               | 98.6  | 4.3 | 23 | 0.7916 |

This table is related to the main Fig 6.

Genotypes of the transgenic animals are summarized in the S6 Table.
